# Supplementary material for: Quatsomes as versatile fluorescent nanocarriers: stable Eosin Y loading and FRET with a membrane dye
Source: Royal Society of Chemistry journal article supplement (doi:10.1039/d6na00124f), 2026-05-15
Supplement: d6na00124f1.pdf [file d6na00124f1.pdf]

## Supporting Information for Quasomes as Versatile Fluorescent Nanocarriers: Stable Eosin Y Loading and FRET with a Membrane Dye

Andrea Delledonne,<sup>a,†</sup> Guillem Vargas-Nadal,<sup>b,c,‡</sup> Giacomo Cotelli,<sup>a</sup> Nora Ventosa,<sup>b,c</sup> Mariana Köber,<sup>b,c\*</sup> and Cristina Sissa<sup>a\*</sup>

<sup>a</sup> Dipartimento di Scienze Chimiche, della Vita e della Sostenibilità Ambientale, Università di Parma, Parco Area delle Scienze 17A, 43124, Parma, Italy, <sup>b</sup> Institute of Materials Science of Barcelona (ICMAB-CSIC), Universitat Autònoma de Barcelona, 08193 Barcelona, Spain; <sup>c</sup>Centro de Investigación Biomédica en Red in the Subject Area of Bioengineering, Biomaterials and Nanomedicine (CIBER-BBN), 28029 Madrid, Spain

### S1 Materials and Methods

Table S1: Summary of the initial concentrations of the components used to prepare the QS suspensions. The concentrations of the dyes after diafiltration and the corresponding encapsulation efficiencies are also reported.

| Preparation method | Sample                | Initial concentrations |      |             |             | Encapsulated dyes |            | E.E. |     |
|--------------------|-----------------------|------------------------|------|-------------|-------------|-------------------|------------|------|-----|
|                    |                       | Cholesterol            | CTAB | EoY         | DiD         | EoY               | DiD        | EoY  | DiD |
| Pre-assembly       | QS@EoY                | 7 mM                   | 7 mM | 138 $\mu$ M | -           | 113 $\mu$ M       | -          | 82%  | -   |
|                    | QS@EoY-DiD            | 7 mM                   | 7 mM | 138 $\mu$ M | 100 $\mu$ M | 129 $\mu$ M       | 77 $\mu$ M | 94%  | 77% |
|                    | QS@EoY high conc.     | 7 mM                   | 7 mM | 320 $\mu$ M | -           | 281 $\mu$ M       | -          | 88%  | -   |
|                    | QS@EoY-DiD high conc. | 7 mM                   | 7 mM | 320 $\mu$ M | 100 $\mu$ M | 308 $\mu$ M       | 77 $\mu$ M | 96%  | 77% |
| Post-assembly      | QS@EoY                | 7 mM                   | 7 mM | 138 $\mu$ M | -           | 103 $\mu$ M       | -          | 75%  | -   |
|                    | QS@EoY-DiD            | 7 mM                   | 7 mM | 138 $\mu$ M | 100 $\mu$ M | 123 $\mu$ M       | 66 $\mu$ M | 89%  | 66% |
|                    | QS@EoY high conc.     | 7 mM                   | 7 mM | 320 $\mu$ M | -           | 290 $\mu$ M       | -          | 91%  | -   |
|                    | QS@EoY-DiD high conc. | 7 mM                   | 7 mM | 320 $\mu$ M | 100 $\mu$ M | 298 $\mu$ M       | 60 $\mu$ M | 93%  | 60% |

## S2 Physicochemical characterization

Table S2: DLS and ELS results of QS suspensions as the average of three measurements with the corresponding standard error of the mean (SEM). Measurements were performed at 25°C as described in the technical section of the main text.

| Sample Type   | Sample                | Hydrodynamic diameter <sup>a</sup> (nm) | PdI         | Apparent $\zeta$ -potential <sup>b</sup> (mV) |
|---------------|-----------------------|-----------------------------------------|-------------|-----------------------------------------------|
| -             | Plain QS              | 91 ± 1                                  | 0.4 ± 0.02  | 94 ± 1                                        |
| Pre-assembly  | QS@EoY                | 87 ± 1                                  | 0.23 ± 0.01 | 83 ± 2                                        |
|               | QS@EoY-DiD            | 93 ± 2                                  | 0.41 ± 0.02 | 91 ± 2                                        |
|               | QS@EoY high conc.     | 88 ± 2                                  | 0.30 ± 0.01 | 87 ± 2                                        |
|               | QS@EoY-DiD high conc. | 97 ± 2                                  | 0.37 ± 0.01 | 97 ± 1                                        |
| Post-assembly | QS@EoY                | 94 ± 2                                  | 0.30 ± 0.01 | 78 ± 1                                        |
|               | QS@EoY-DiD            | 105 ± 2                                 | 0.32 ± 0.01 | 78 ± 1                                        |
|               | QS@EoY high conc.     | 90 ± 1                                  | 0.31 ± 0.01 | 84 ± 2                                        |
|               | QS@EoY-DiD high conc. | 111 ± 2                                 | 0.33 ± 0.02 | 77 ± 2                                        |

<sup>a</sup> Obtained from the corresponding peak in the particle size distribution by intensity.

<sup>b</sup> Apparent  $\zeta$ -potential calculated using the Helmholtz-Smoluchowski equation.

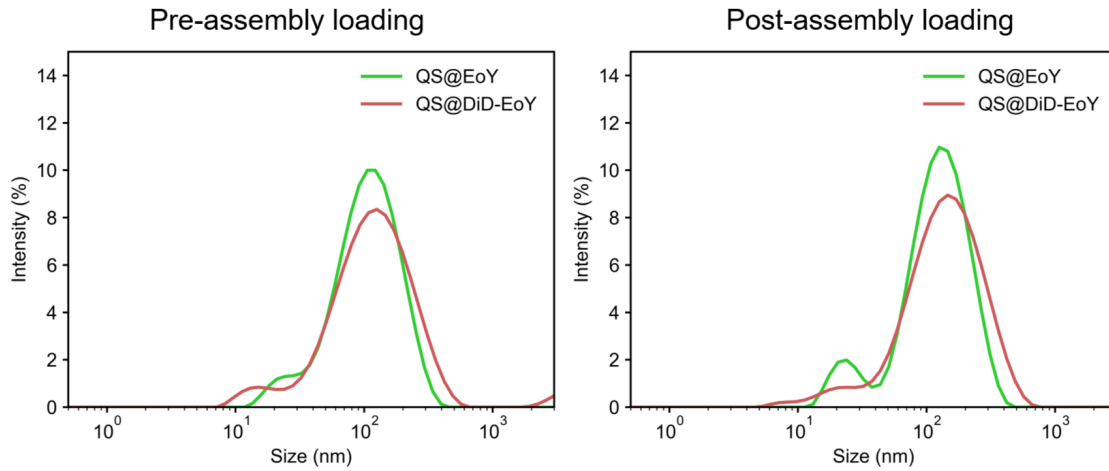

Figure S1: DLS intensity-weighted size distributions of the lower concentration samples reported in Table S2.

### S3 Spectroscopic Data

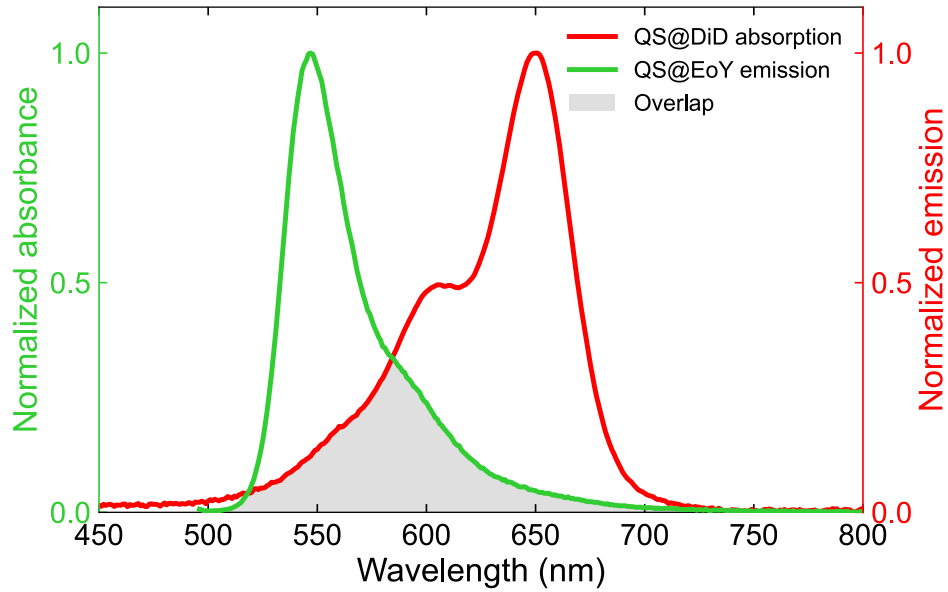

Figure S2: Comparison between the absorption spectrum of QSs loaded only with DiD (dye concentration 100  $\mu\text{M}$ ) and the emission of QSs loaded only with EoY (dye concentration 100  $\mu\text{M}$ ).

Table S3: Spectroscopic properties of pre-assembly and post-assembly QSs with higher concentration of EoY (320  $\mu\text{M}$ ).

| Sample                   | Donor quantum yield $\phi^a$ (%) |               | Donor fluorescence lifetime $\langle\tau\rangle^b$ (ns) |               |
|--------------------------|----------------------------------|---------------|---------------------------------------------------------|---------------|
|                          | Pre-assembly                     | Post-assembly | Pre-assembly                                            | Post-assembly |
| QS@-EoY (high conc.)     | 9                                | 8             | 0.62                                                    | 0.57          |
| QS@-DiD-EoY (high conc.) | 2                                | 3             | 0.62                                                    | 0.45          |

<sup>a</sup> In presence of DiD,  $\phi$  values were obtained by selectively exciting EoY at 490 nm and integrating only its band in the emission spectra.

<sup>b</sup> Fluorescence lifetimes were measured with excitation at 405 nm and emission collected at 550 nm. Average lifetimes  $\langle\tau\rangle$  calculated via a tri-exponential fit using the formula  $\langle\tau\rangle = \frac{A_1\tau_1^2 + A_2\tau_2^2 + A_3\tau_3^2}{A_1\tau_1 + A_2\tau_2 + A_3\tau_3}$ .

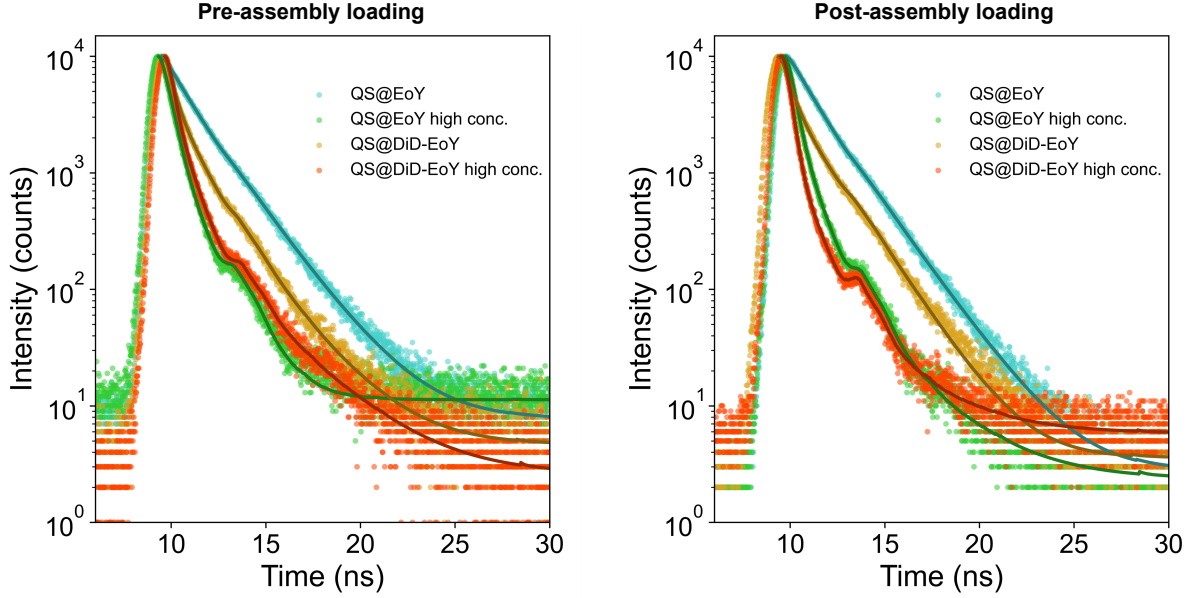

Figure S3: Fluorescence lifetime decays of Eosin Y in Quatsomes prepared via pre-assembly (left) and post-assembly (right) loading. Measurements were performed using a 405 nm picosecond-pulsed laser for excitation, and emission was collected at 550 nm, corresponding to the EoY fluorescence maximum. The darker lines correspond to the fitting lines obtained through reconvolution exponential components fitting, whose corresponding optimized parameters are reported in Table S4.

Table S4: Optimized parameters obtained using a reconvolution exponential components fitting from the FAST software

| Sample                                 | $A_1$ (ns)   | $\tau_1$ (ns) | $A_2$ (ns)   | $\tau_2$ (ns) | $A_3$ (ns)   | $\tau_3$ (ns) | $\langle \tau \rangle$ (ns) | $\chi^2$ |
|----------------------------------------|--------------|---------------|--------------|---------------|--------------|---------------|-----------------------------|----------|
| QS@-EoY pre-assembly                   | 0.0146 (44%) | 1.185         | 0.0105 (56%) | 2.114         | -            | -             | 1.71                        | 1.311    |
| QS@-EoY post-assembly                  | 0.0128 (38%) | 1.098         | 0.0116 (62%) | 2.006         | -            | -             | 1.66                        | 0.620    |
| QS@DiD-EoY pre-assembly                | 0.0336 (38%) | 0.283         | 0.0099 (45%) | 1.116         | 0.0018 (17%) | 2.366         | 1.01                        | 1.447    |
| QS@DiD-EoY post-assembly               | 0.0252 (42%) | 0.449         | 0.0090 (58%) | 1.778         | -            | -             | 1.23                        | 1.047    |
| QS@-EoY (high conc.) pre-assembly      | 0.0332 (48%) | 0.278         | 0.0123 (48%) | 0.761         | 0.0002 (4%)  | 2.763         | 0.62                        | 1.187    |
| QS@-EoY (high conc.) post-assembly     | 0.0411 (63%) | 0.292         | 0.0069 (33%) | 0.901         | 0.0002 (4%)  | 2.907         | 0.57                        | 0.455    |
| QS@-DiD-EoY (high conc.) pre-assembly  | 0.0545 (52%) | 0.179         | 0.0101 (40%) | 0.755         | 0.0005 (8%)  | 2.873         | 0.62                        | 1.267    |
| QS@-DiD-EoY (high conc.) post-assembly | 0.0592 (77%) | 0.218         | 0.0036 (19%) | 0.915         | 0.0002 (4%)  | 3.001         | 0.45                        | 1.426    |

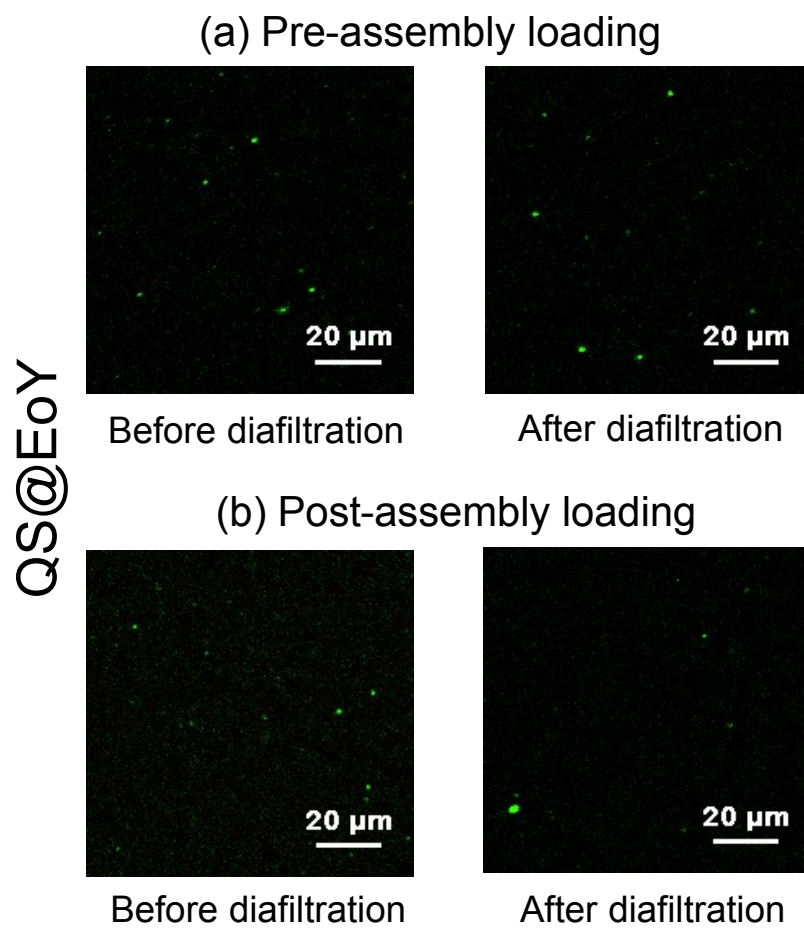

Figure S4: Two-photon microscopy images of EoY-labelled Quatsomes prepared via pre-assembly (panel a) and post-assembly (panel b) loading, shown both before and after diafiltration. All images were acquired under identical conditions using 1000 nm excitation at 3% laser power.

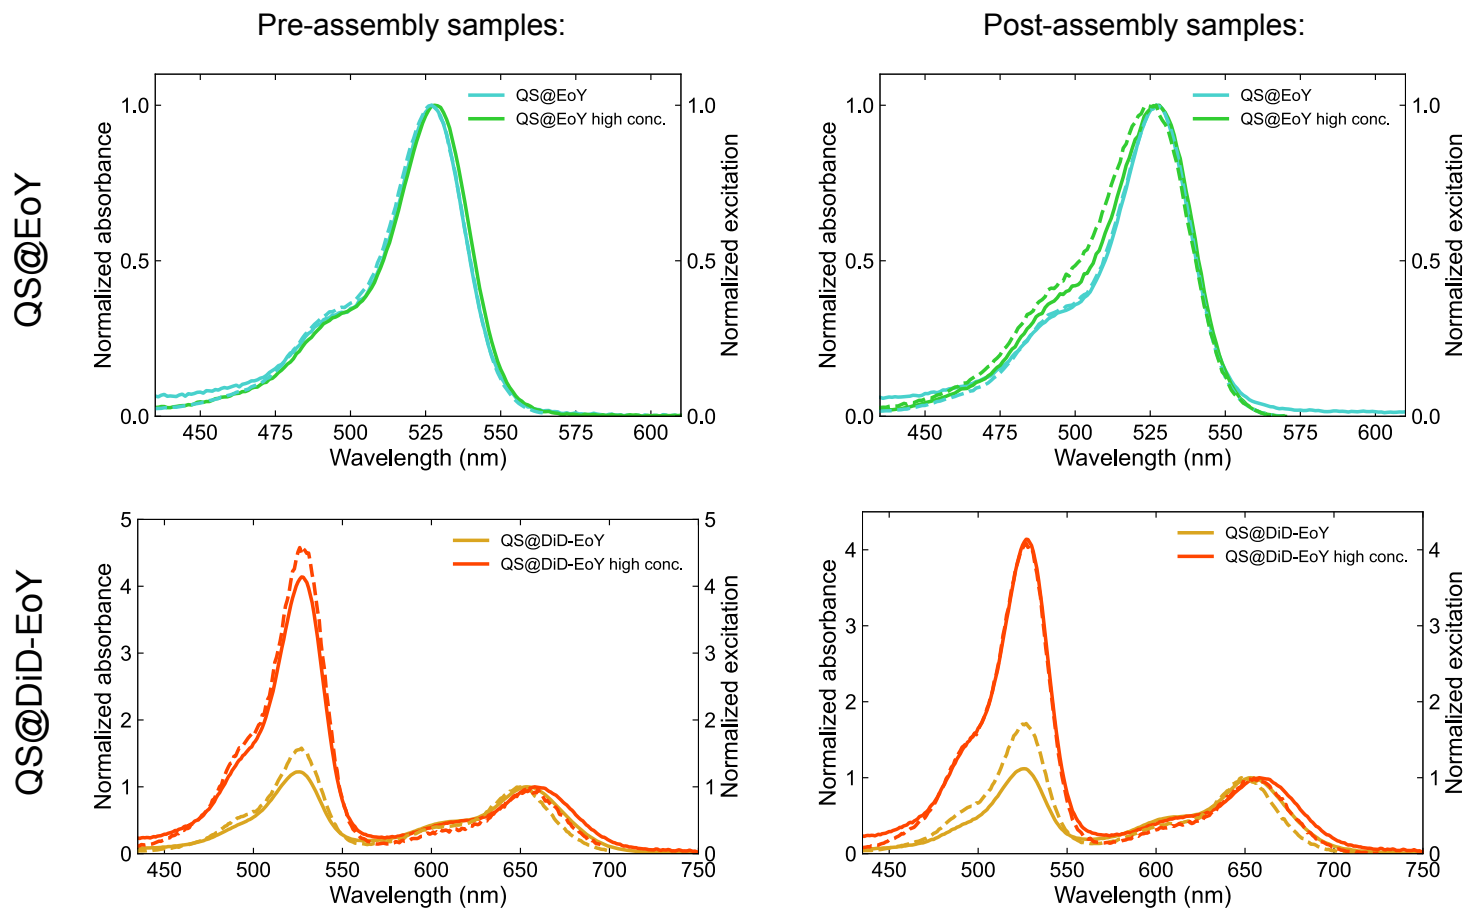

Figure S5: Comparison of absorbance (solid lines) and excitation spectra (dashed lines) for pre-assembly (left) and post-assembly (right) Quatsome formulations. Excitation spectra were recorded by monitoring EoY emission at 575 or 590 nm (for QS@EoY), and DiD emission at 700 or 730 nm (for QS@DiD-EoY samples).

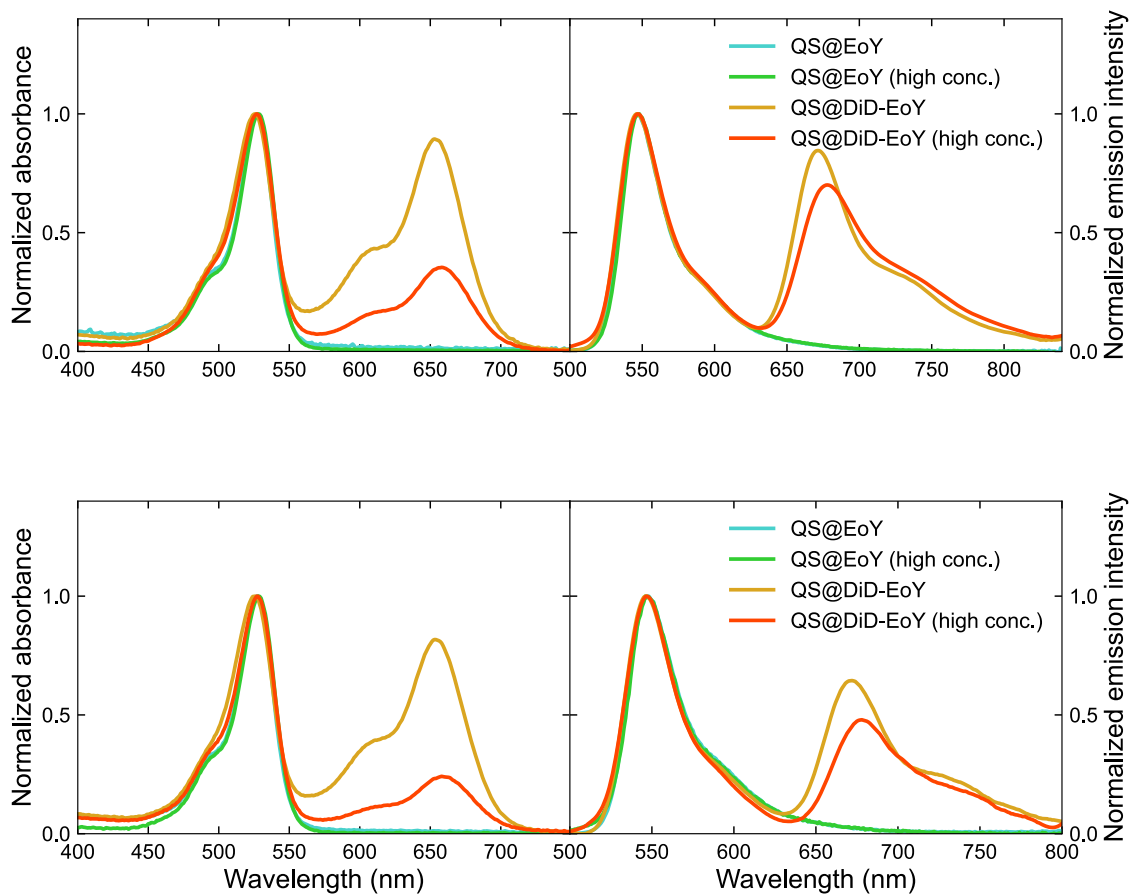

Figure S6: Absorption and emission spectra of pre-assembly (left) and post-assembly (right) QSs samples, prepared with two different concentrations of the energy donor dye Eosin Y (EoY), with and without the presence of the energy acceptor dye DiD. Emission spectra were recorded upon selective excitation of EoY: at 490 nm for EoY-only samples and at 475 nm for samples containing both EoY and DiD. All emission spectra are normalized to the energy donor (EoY) emission intensity to facilitate the qualitative comparison of FRET efficiency.

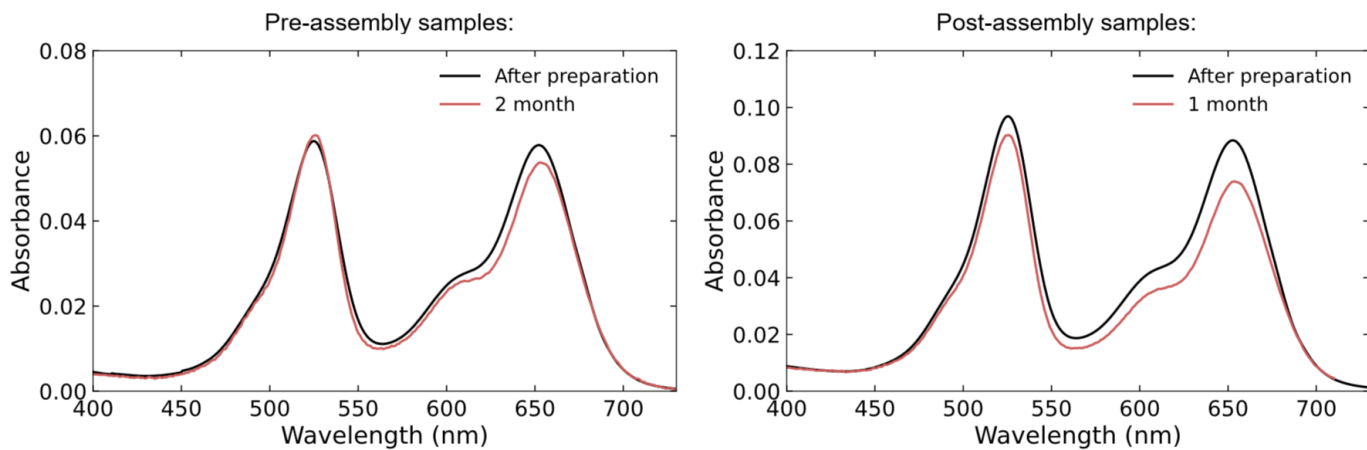

Figure S7: Time-dependent stability of Qs prepared with EoY and DiD, assessed by comparing absorption spectra recorded after preparation and after 1 or 2 months. Pre-assembly and post-assembly samples were diluted 1:200 and 1:120, respectively, before measurement.
